# Supplementary material for: Neuronal representation of saccadic error in macaque posterior parietal cortex (PPC)
Source: eLife journal article supplement (doi:10.7554/elife.10912), 2016-04-20
Supplement: supp [file elife-10912-supp-v1.zip]

Archive with 8 entries (8 files):
- elife_poa_e10912_Figure_2_figure_supplement_4.pdf
- elife_poa_e10912_Figure_3_figure_supplement_1.pdf
- elife_poa_e10912_Figure_4_figure_supplement_3.pdf
- elife_poa_e10912_Figure_2_figure_supplement_2.pdf
- elife_poa_e10912_Figure_2_figure_supplement_3.pdf
- elife_poa_e10912_Figure_4_figure_supplement_2.pdf
- elife_poa_e10912_Figure_2_figure_supplement_1.pdf
- elife_poa_e10912_Figure_4_figure_supplement_1.pdf
