# Supplementary figures and images for: Neuronal representation of saccadic error in macaque posterior parietal cortex (PPC)
Source: eLife journal article supplement (doi:10.7554/elife.10912), 2016-04-20

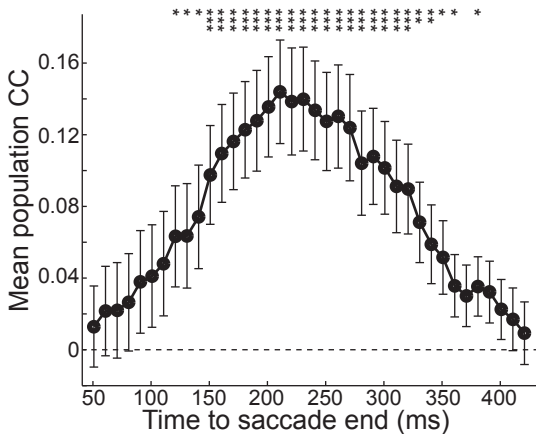

Figure 4-figure supplementary 1

Supplement: supp [file elife-10912-supp-v1.zip]

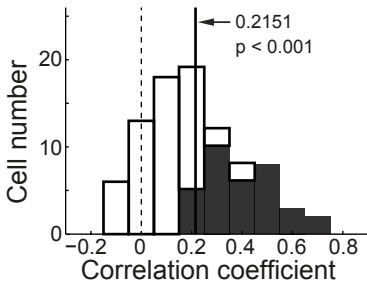

Figure 2-figure supplement 1

Supplement: supp [file elife-10912-supp-v1.zip]

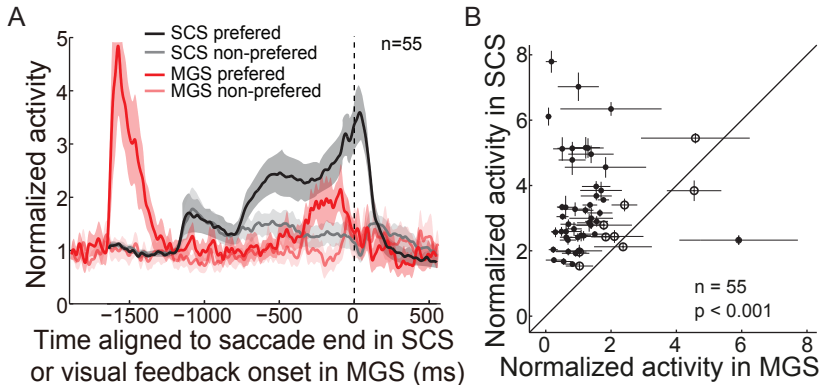

Figure 2-figure supplementary 3

Supplement: supp [file elife-10912-supp-v1.zip]

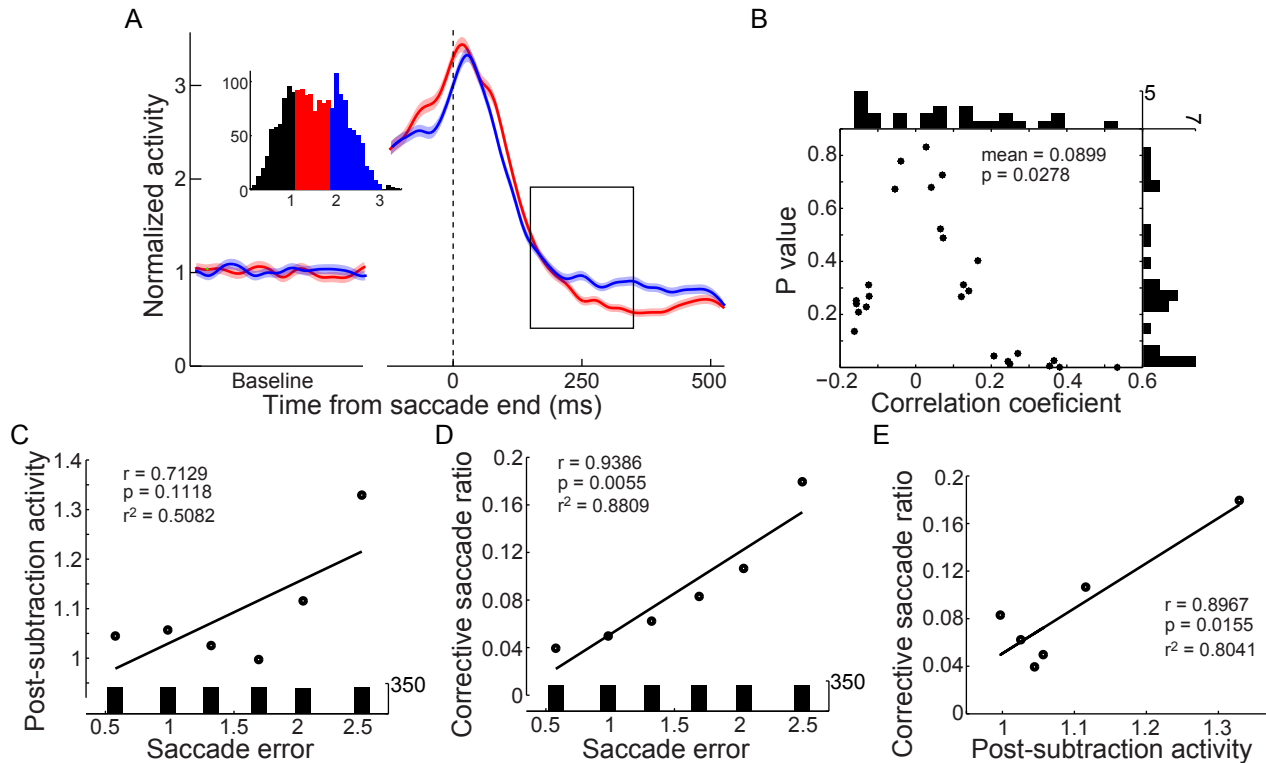

Figure 4-figure supplementary 2

Supplement: supp [file elife-10912-supp-v1.zip]

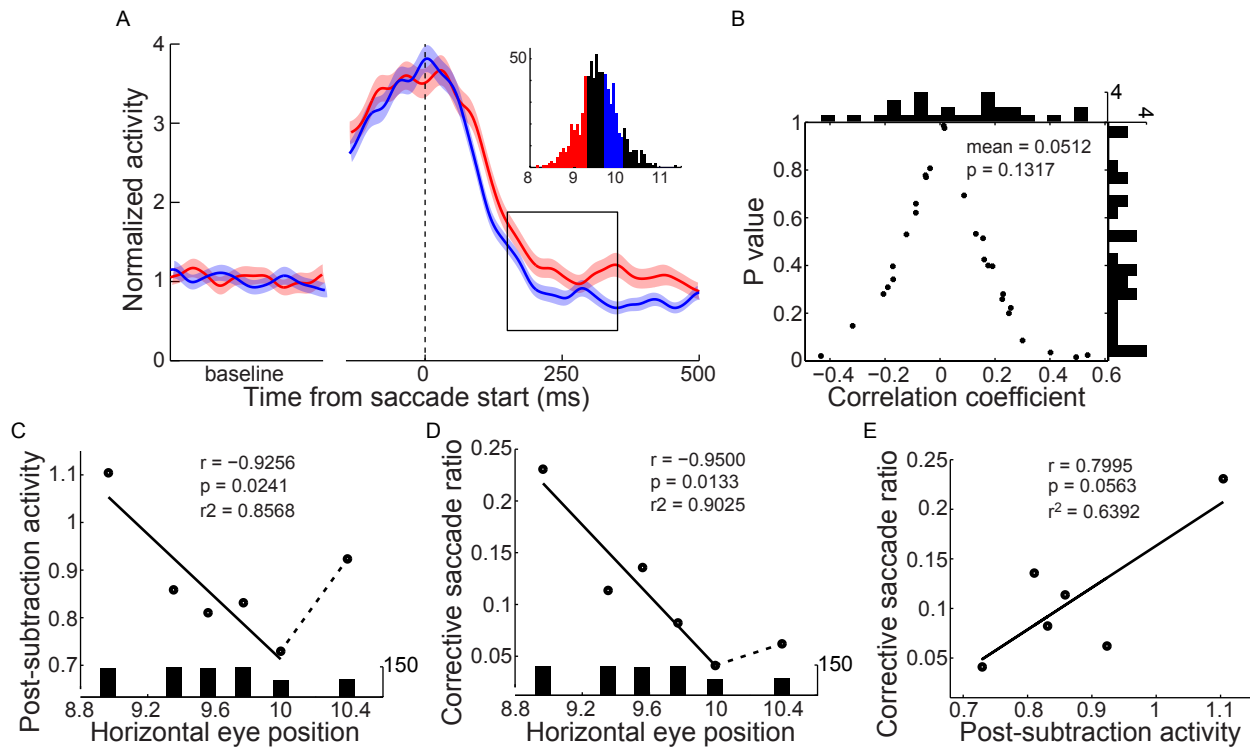

Figure 4-figure supplementary 3

Supplement: supp [file elife-10912-supp-v1.zip]

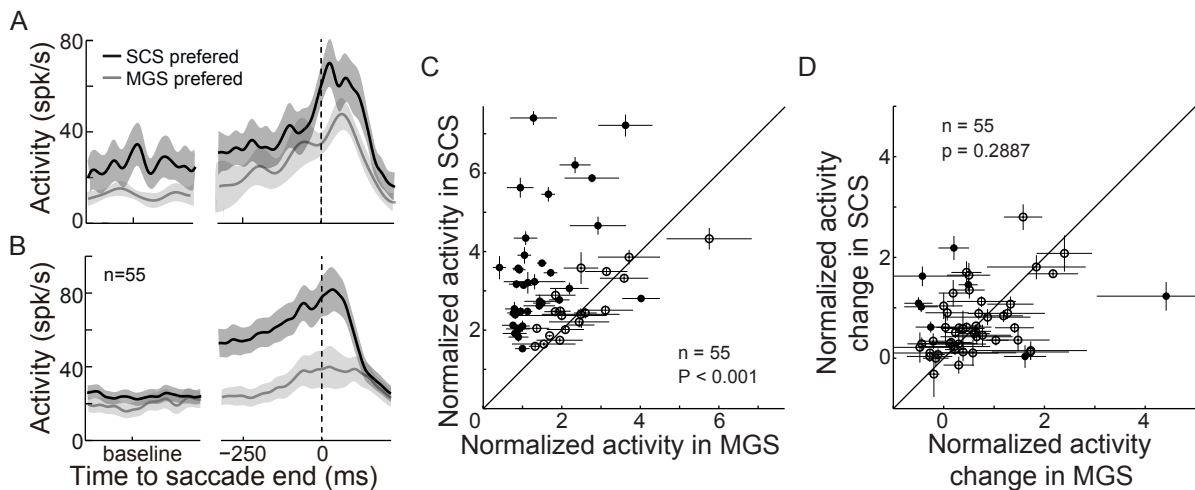

Figure 2-figure supplementary 4

Supplement: supp [file elife-10912-supp-v1.zip]

A

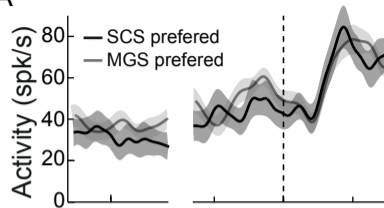

B

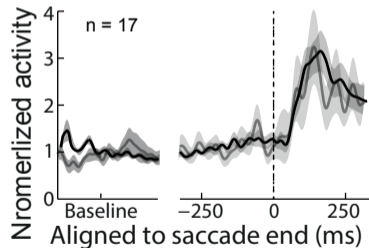

C

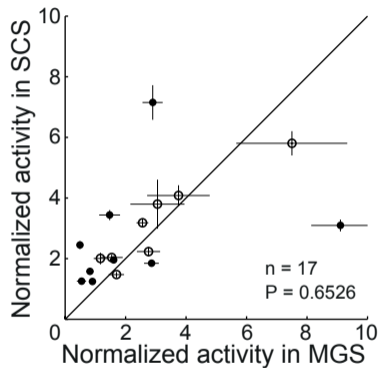

D

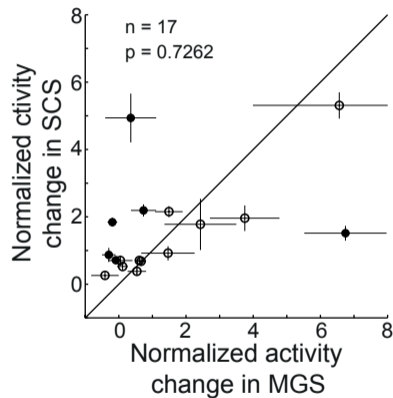

Figure 3-figure supplementary 1

Supplement: supp [file elife-10912-supp-v1.zip › elife_poa_e10912_Figure_3_figure_supplement_1.pdf]

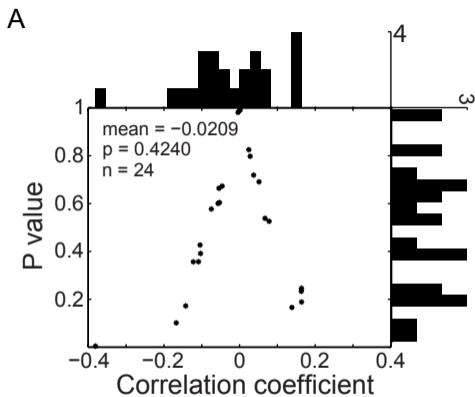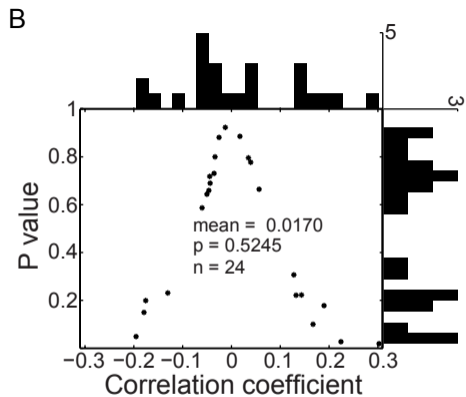

Figure 2-figure supplementary 2

Supplement: supp [file elife-10912-supp-v1.zip › elife_poa_e10912_Figure_2_figure_supplement_2.pdf]
